# Supplementary material for: Integrating Fermentation Engineering and Organopalladium Chemocatalysis for the Production of Squalene from Biomass-Derived Carbohydrates as the Starting Material
Source: MDPI journal article supplement (doi:10.3390/catal13111392), 2023-10-25
Supplement: s1 [file s1]

Supporting information

# Integrating Fermentation Engineering and Organopalladium Chemocatalysis for the Production of Squalene from Biomass-derived Carbohydrate as the Starting Material

Cuicui Wu, Kaifei Tian, Xuan Guo \*, Yunming Fang \*

National Energy R&D Research Center for Biorefinery, Department of Chemical Engineering, Beijing University of Chemical Technology, Beijing 100029, China; wu941210@buct.edu.cn (C.W.); tiankfei@126.com (K.T.)

\* Correspondence: Corresponding author: Dr. Xuan Guo, guoxuan19930426@163.com; Prof. Yunming Fang, fangym@mail.buct.edu.cn

Number of pages: S8

Number of Figures: 4

Number of Tables: 3

## Table of Content

### *Materials and Methods*

S2

### *Table S1. Biobased $\beta$ -farnesene of the $^1\text{H}$ and $^{13}\text{C}$ NMR-chemical shifts*

S3

### *Table S2. Concentration gradient of standard curve*

S3

### *Figure S1. GC chromatogram of $\beta$ -farnesene using internal standard method*

S4

### *Figure S2. Mass spectrum of the purified squalene product*

S5

### *Table S3. Purified squalene of the $^1\text{H}$ and $^{13}\text{C}$ NMR-chemical shifts*

S6

### *Figure S3. Molecular structure of homogeneous palladium catalysts*

S7

### *Figure S4. Strain transformation route*

S8

## Materials and Methods

### *Solution composition*

Vitamin solution included 50 mg/L of biotin, 80 mg/L of NaOH, 1 g/L of D-pantothenic acid, 1 g/L of thiamin HCl, 1 g/L of pyridoxin HCl, 1 g/L of nicotinic acid and 1 g/L of 4-aminobenzoic. Trace metal solution included 5.75 g/L of  $\text{ZnSO}_4 \cdot 7\text{H}_2\text{O}$ , 0.32 g/L of  $\text{MnCl}_2 \cdot 4\text{H}_2\text{O}$ , anhydrous 0.32 g/L of  $\text{CuSO}_4$ , 0.47 g/L of  $\text{CoCl}_2 \cdot 6\text{H}_2\text{O}$ , 0.48 g/L of  $\text{Na}_2\text{MoO}_4 \cdot 2\text{H}_2\text{O}$ , 2.80 g/L of  $\text{FeSO}_4 \cdot 7\text{H}_2\text{O}$ , 2.90 g/L of  $\text{CaCl}_2 \cdot 2\text{H}_2\text{O}$  and 0.5 M 80 mL/L of EDTA (pH = 8).

### *Preparation of preculture and shake flask cultivations*

1. 20  $\mu\text{L}$  of frozen cells were transferred to 4 mL Yeast Peptone Dextrose medium in a 50 mL glass tube, cultivated in the shaker at 200 rpm and 30 °C overnight.
2. The resulting (1) bacterial solution was streaked on an agar plate and placed in a 28 °C incubator for 2-3 days, in order to further activate the strains.
3. Excellent single colonies were screened, further introduced to 5 mL Yeast Peptone Dextrose medium in a 50 mL glass tube. After cultivation overnight at 200 rpm and 30 °C, a primary seed solution was obtained.
4. 1 mL of primary seed solution was inoculated into a 250 mL shake flask containing 50 mL seed medium and cultured in a shaker for 8-12 h to get a secondary seed solution with  $\text{OD}_{600}$  of 1-2 used for 2.5 L bioreactor cultivations.

**Table S1.** Biobased  $\beta$ -farnesene of the  $^1\text{H}$  and  $^{13}\text{C}$  NMR-chemical shifts.

| Atom marked | $\delta$ $^1\text{H}$ -NMR (ppm) | $\delta$ $^{13}\text{C}$ -NMR (ppm) |
|-------------|----------------------------------|-------------------------------------|
| 1           | 5.02-5.30                        | 115.71                              |
| 2           | 6.37-6.44                        | 146.13                              |
| 3           | -                                | 139.08                              |
| 4           | 5.02-5.30                        | 112.94                              |
| 5           | 1.99-2.29                        | 31.49                               |
| 6           | 1.99-2.29                        | 26.78                               |
| 7           | 5.02-5.30                        | 124.47                              |
| 8           | -                                | 135.29                              |
| 9           | 1.63-1.74                        | 16.0                                |
| 10          | 1.99-2.29                        | 39.79                               |
| 11          | 1.99-2.29                        | 26.69                               |
| 12          | 5.02-5.30                        | 124.13                              |
| 13          | -                                | 131.13                              |
| 14          | 1.63-1.74                        | 17.65                               |
| 15          | 1.63-1.74                        | 25.69                               |

**Table S2.** Concentration gradient of standard curve.

| Compounds          | Concentration gradient |          |          |          |          |          |
|--------------------|------------------------|----------|----------|----------|----------|----------|
| $\beta$ -farnesene | 0.5 g/L                | 1 g/L    | 2 g/L    | 3 g/L    | 4 g/L    | 5 g/L    |
| tetradecane        | 900 mg/L               | 900 mg/L | 900 mg/L | 900 mg/L | 900 mg/L | 900 mg/L |

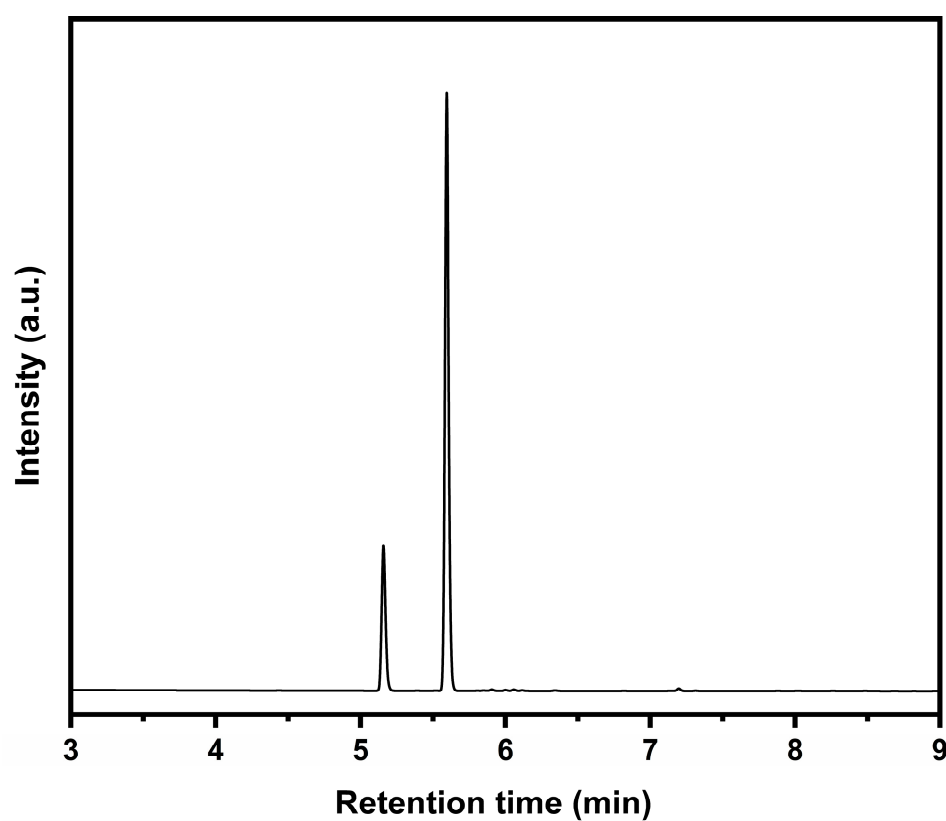

**Figure S1.** GC chromatogram of  $\beta$ -farnesene using internal standard method (Retention time 5.102 min: tetradecane; Retention time 5.545 min:  $\beta$ -farnesene).

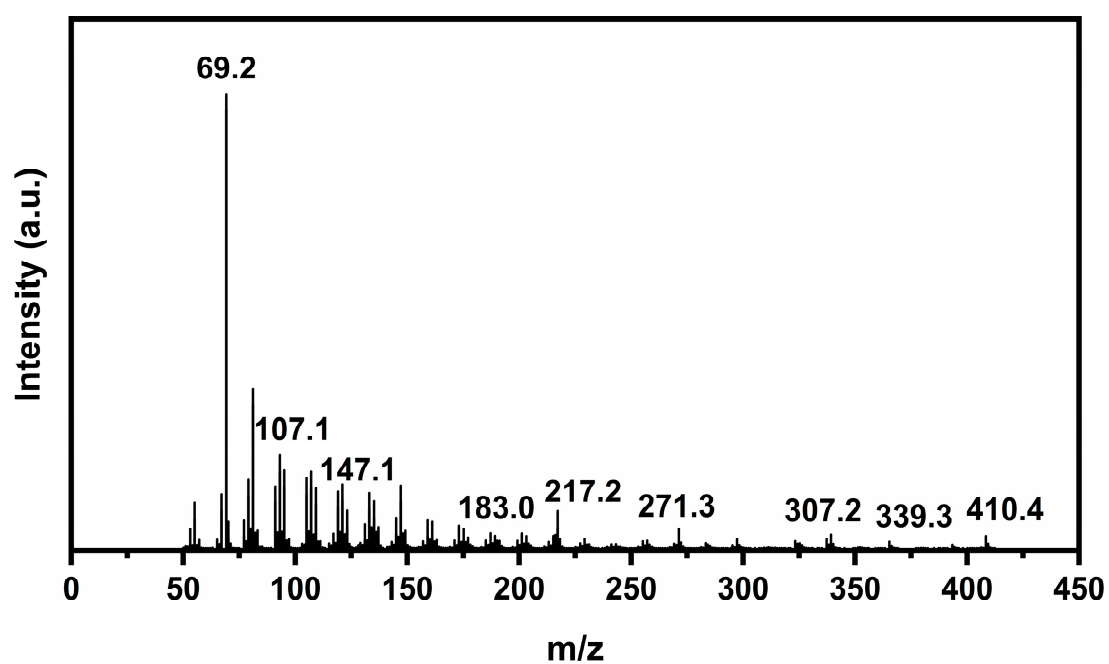

Figure S2. Mass spectrum of the purified squalene product.

**Table S3.** Purified squalene of the  $^1\text{H}$  and  $^{13}\text{C}$  NMR-chemical shifts.

| Atom marked | $\delta$ $^1\text{H}$ -NMR (ppm) | $\delta$ $^{13}\text{C}$ -NMR (ppm) |
|-------------|----------------------------------|-------------------------------------|
| 1           | 1.29-1.35                        | 22.67                               |
| 2           | -                                | 135.14                              |
| 3           | 5.10-5.20                        | 124.41                              |
| 4           | 1.99-2.84                        | 26.75                               |
| 5           | 1.99-2.84                        | 40.01                               |
| 6           | -                                | 129.44                              |
| 7           | 5.10-5.20                        | 124.43                              |
| 8           | 1.99-2.84                        | 26.49                               |
| 9           | 1.99-2.84                        | 39.93                               |
| 10          | -                                | 132.32                              |
| 11          | 5.10-5.20                        | 124.35                              |
| 12          | 1.99-2.84                        | 26.77                               |
| 13          | 1.99-2.84                        | 26.85                               |
| 14          | 5.10-5.20                        | 124.41                              |
| 15          | -                                | 132.82                              |
| 16          | 1.99-2.84                        | 39.75                               |
| 17          | 1.99-2.84                        | 26.42                               |
| 18          | 5.10-5.20                        | 124.26                              |
| 19          | -                                | 131.17                              |
| 20          | 1.99-2.84                        | 39.95                               |
| 21          | 1.99-2.84                        | 26.57                               |
| 22          | 5.10-5.20                        | 124.08                              |
| 23          | -                                | 135.19                              |
| 24          | 1.29-1.35                        | 22.75                               |
| 25          | 1.68-1.71                        | 16.02                               |
| 26          | 1.63-1.66                        | 17.67                               |
| 27          | 1.63-1.66                        | 17.58                               |
| 28          | 1.63-1.66                        | 17.55                               |
| 29          | 1.63-1.66                        | 17.70                               |
| 30          | 1.68-1.71                        | 16.08                               |

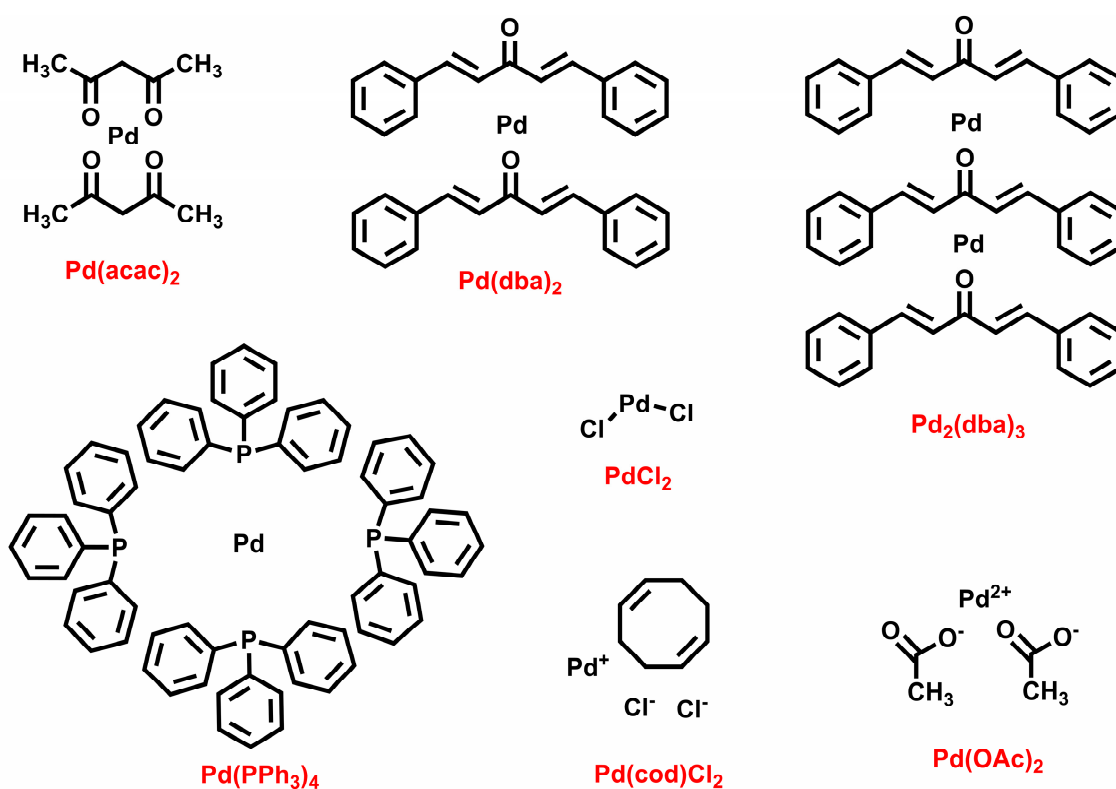

Figure S3. Molecular structure of homogeneous palladium catalysts.

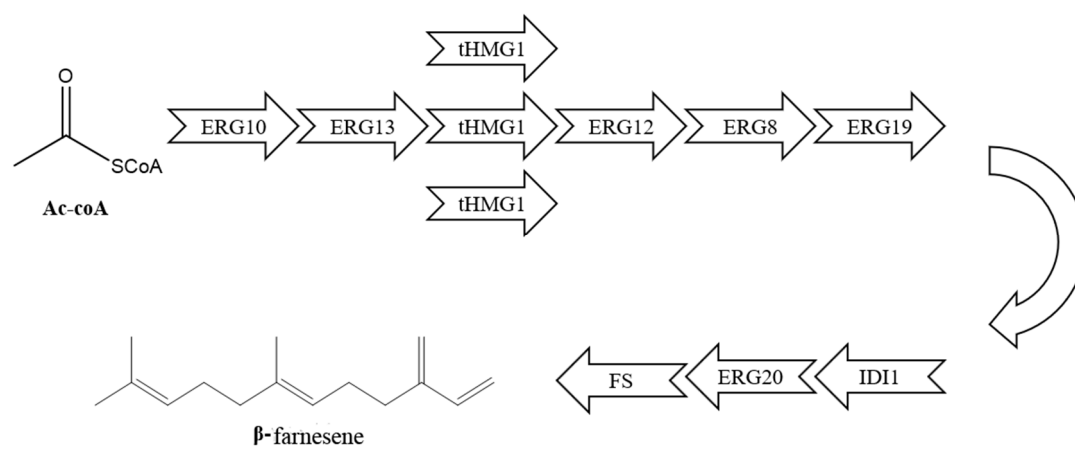

**Figure S4.** Strain transformation route.
